# Supplementary material
Source: MDPI journal article supplement (https://www.mdpi.com/2073-4344/14/2/138)
Supplement: s1 [file s1 › catalysts-2847340-supplementary.pdf]

# Supporting information

## Regulating the Hydrodeoxygenation Activity of Molybdenum Carbide with Different Diamines as Carbon Sources

Linyuan Zhou <sup>1</sup>, Huiru Yang <sup>1</sup>, Xiangze Du<sup>2</sup> and Changwei Hu <sup>\*</sup>

<sup>1</sup> Key Laboratory of Green Chemistry and Technology, Ministry of Education, College of Chemistry, Sichuan University, Chengdu 610064, China; zhoulinyuan1999@163.com

<sup>2</sup> State Key Laboratory of Catalysis, Dalian Institute of Chemical Physics, Chinese Academy of Sciences, Dalian 116023, China; [xiangzedu@dicp.ac.cn](mailto:xiangzedu@dicp.ac.cn)

<sup>\*</sup> Correspondence: [changwei.hu@scu.edu.cn](mailto:changwei.hu@scu.edu.cn); Tel.: +86-028-8541-1105

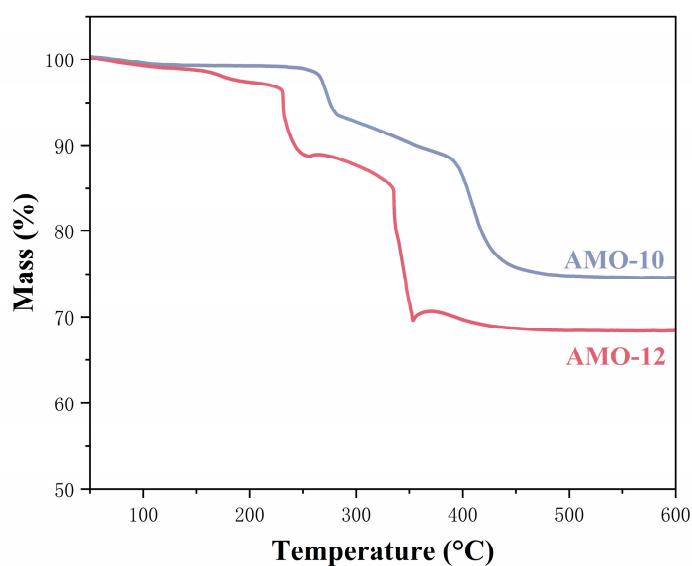

**Figure S1.** TG curves for AMO-10 and AMO-12 in 20% O<sub>2</sub>/N<sub>2</sub> atmosphere.

**Table S1.** Element contents of AMO-10 and AMO-12.

| Catalyst             | Mo <sup>a</sup> (wt%) | C <sup>b</sup> (wt%) | N <sup>b</sup> (wt%) | H <sup>b</sup> |
|----------------------|-----------------------|----------------------|----------------------|----------------|
| Mo <sub>2</sub> C-10 | 50.07                 | 15.79                | 3.74                 | 3.19           |
| Mo <sub>2</sub> C-12 | 46.07                 | 18.88                | 3.69                 | 3.78           |

<sup>a</sup> Calculated by TG results;<sup>b</sup> Obtained by elemental analysis.

In order to calculate the possible chemical formula of AMO-10 and AMO-12, TG of AMO-10 and AMO-12 were conducted under 20% O<sub>2</sub>/N<sub>2</sub> atmosphere, as shown in Figure S1. Weight loss before 150 °C was considered as water. AMO precursors were ultimately completely oxidized to MoO<sub>3</sub>, with the remaining masses of AMO-10 and AMO-12 being 74.63% and 68.45%. Based on the element contents shown in Table S1, the simplest chemical composition of AMO-10 and AMO-12 were calculated, which are (NH<sub>3</sub>C<sub>10</sub>H<sub>20</sub>NH<sub>3</sub>)·Mo<sub>4</sub>O<sub>13</sub> and (NH<sub>3</sub>C<sub>12</sub>H<sub>24</sub>NH<sub>3</sub>)·Mo<sub>4</sub>O<sub>13</sub>, respectively.

**Table S2.** Surface contents on Mo<sub>2</sub>C catalysts calculated from XPS.

| Catalyst             | Mo (at%) | C (at%) | O (at%) |
|----------------------|----------|---------|---------|
| Mo <sub>2</sub> C-6  | 36.9     | 15.5    | 47.6    |
| Mo <sub>2</sub> C-8  | 37.2     | 18.9    | 43.9    |
| Mo <sub>2</sub> C-10 | 33.9     | 27.3    | 38.8    |
| Mo <sub>2</sub> C-12 | 24.6     | 52.1    | 23.2    |

**Table S3.** Surface contents of C and Mo in different chemical states in catalysts.

| Catalyst                 | C 1s (%) |      |         | Mo 3d (%)         |                                                      |
|--------------------------|----------|------|---------|-------------------|------------------------------------------------------|
|                          | C-Mo     | C-C  | C-O/C=O | Mo <sub>2</sub> C | Mo <sup>b+</sup> /Mo <sup>4+</sup> /Mo <sup>6+</sup> |
| <b>Mo<sub>2</sub>C-6</b> | 9.7      | 34.8 | 55.5    | 25.3              | 74.7                                                 |
| Mo <sub>2</sub> C-8      | 18.2     | 39.9 | 41.9    | 22.8              | 77.2                                                 |
| Mo <sub>2</sub> C-10     | 15.0     | 49.9 | 35.1    | 29.3              | 70.7                                                 |
| Mo <sub>2</sub> C-12     | 14.2     | 48.0 | 37.8    | 29.7              | 70.3                                                 |

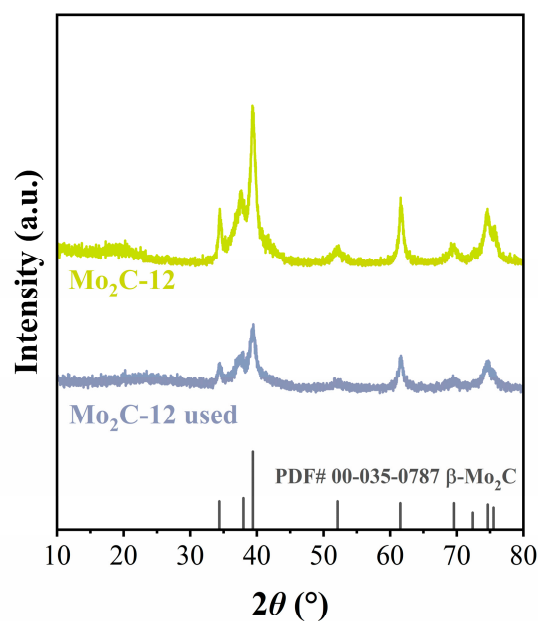

**Figure S2.** XRD patterns of fresh and used Mo<sub>2</sub>C-12 catalyst.

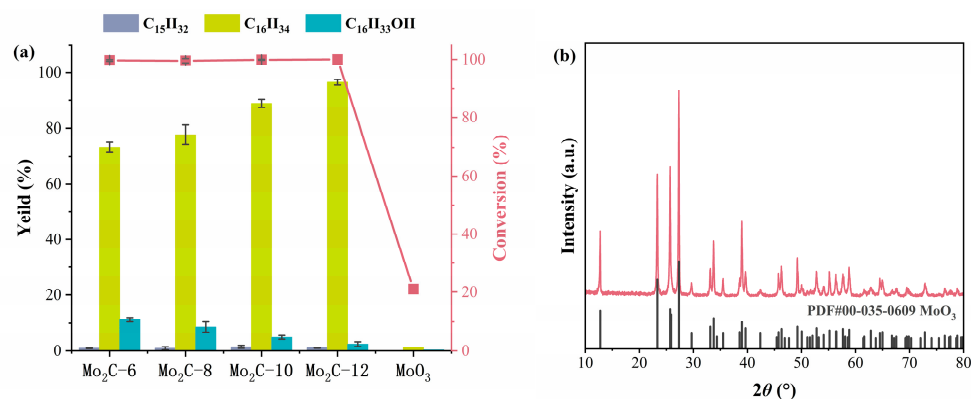

**Figure S3.** (a) The reactivity results for converting palmitic acid over different Mo<sub>2</sub>C catalysts and MoO<sub>3</sub>. (b) XRD pattern of MoO<sub>3</sub>.

AHM powder was calcined in a muffle oven at 500°C for 4 hours to synthesize MoO<sub>3</sub>. The catalytic activity was tested under the same reaction conditions as other catalysts. The results were shown in Figure S3 (a). The conversion rate of palmitic acid on pure MoO<sub>3</sub> is only 21.0%, almost no other corresponding products have been detected. There might be undetected products palmityl palmitate. Figure S3 (b) shows the XRD pattern of MoO<sub>3</sub>. This indicated that MoO<sub>3</sub> has poor activity for the hydrodeoxygenation of palmitic acid.
